# Supplementary material for: Overview of digital health teaching courses in medical education in Germany in 2020
Source: PubMed Central journal article supplement (PMC8136344; doi:10.3205/zma001476), 2021-04-15
Supplement: JME-38-4-80-s-001.pdf [file JME-38-4-80-s-001.pdf]

Attachment 1: Overview of teaching projects at medical faculties in Germany

|                  | University             | Course name                                        | Scope and special features                  | Exam                                                                                                                                      | Course content                                                                                                                                                                                                                                                                                                                                                                                                                             |
|------------------|------------------------|----------------------------------------------------|---------------------------------------------|-------------------------------------------------------------------------------------------------------------------------------------------|--------------------------------------------------------------------------------------------------------------------------------------------------------------------------------------------------------------------------------------------------------------------------------------------------------------------------------------------------------------------------------------------------------------------------------------------|
| elective courses | Charité Berlin         | Digital Health: From the App to the smart hospital | 60 lessons within 3 weeks                   | Quiz (not graded). Participation in co-productions & group work as part of the mini-hackathon                                             | Chances and limits of the use of digital procedures for the doctor-patient relationship and practice<br>- Be able to reflect on possible uses of medical apps<br>- Be able to explain the legal, ethical and socio-political framework of digital medicine<br>- Telemedicine & apps                                                                                                                                                        |
|                  | Charité Berlin         | Artificial intelligence in medicine                | 60 lessons within 3 weeks                   | Develop artificial intelligence; review of application idea, short presentation followed by subsequent discussion and structured feedback | Students should...<br>- understand basic principles of Artificial Intelligence and be able to write programs in Python independently<br>- learn about medical applications of artificial intelligence and be able to independently develop new questions and possible applications<br>- get to know the practical, legal and ethical framework and be able to name and reflect on the potentials and challenges of artificial intelligence |
|                  | Ruhr University Bochum | Medicine 4.0                                       | part of elective course, approx. 11 lessons | term paper                                                                                                                                | - Lean Management<br>- Error Management<br>- Agile Management<br>- Digitalisation and its impact on the work environment                                                                                                                                                                                                                                                                                                                   |

|                                           |                                                                 |                                                                                                                                                                                                  |                                            |                                                                                                                                                                                                                                                                                        |
|-------------------------------------------|-----------------------------------------------------------------|--------------------------------------------------------------------------------------------------------------------------------------------------------------------------------------------------|--------------------------------------------|----------------------------------------------------------------------------------------------------------------------------------------------------------------------------------------------------------------------------------------------------------------------------------------|
| Faculty of Medicine Carl Gustav Carus     | Clinicum Digitale                                               | Impulse day and in-depth curriculum of 40 hours, interdisciplinary event for medicine and informatics                                                                                            | not determinable                           | intensive days<br>- basic knowledge of computer science or resp. medicine<br>- legal, economic and also ethical aspects<br>module days:<br>- Human Interface & Robotics<br>- Data Science & Machine Learning<br>Perspective Days<br>- interdisciplinary work or applied digitalisation |
| Albert Ludwig University of Freiburg      | Medical Informatics                                             | 2 Semester hours weekly                                                                                                                                                                          | written presentation                       | - Information Technology<br>- data protection<br>- Documentation<br>- Artificial intelligence                                                                                                                                                                                          |
| Justus Liebig University Giessen          | Digital medicine, eHealth and telemedicine                      | Various compulsory modules and elective modules over several semesters + 30 days of clinical traineeship with a focus on digital medicine                                                        | not determinable                           | - Information Systems<br>- Communication Systems<br>- Artificial intelligence, image processing and pattern recognition<br>- Robotics<br>- Law and ethics                                                                                                                              |
| Martin Luther University Halle-Wittenberg | Teleconsil - interprofessional communication in the digital age | approx. 4 lessons, interprofessionally affiliated with the Skillslab                                                                                                                             | not determinable                           | Medical students and nursing students go through and reflect on an interprofessional televisit in nursing homes                                                                                                                                                                        |
| Medical Center Hamburg-Eppendorf          | Digital Health                                                  | Track in the model study program, two weeks of instruction in the preclinical phase, and five two-week in-depth seminars in the 5th-9th semesters with a final course paper in the 10th semester | Multiple choice exam or short presentation | Topics of the modules:<br>1.) Telemedicine<br>2.) Robotics, automation and VR & AR<br>3.) Artificial Intelligence<br>4.) Big Data: omics and biomarkers for personalized medicine<br>5.) Smart Medical Devices and Health Apps                                                         |

|                                        |                                                                               |                                                                                                                                |                                                            |                                                                                                                                                                                                                                                                                                                                                                            |
|----------------------------------------|-------------------------------------------------------------------------------|--------------------------------------------------------------------------------------------------------------------------------|------------------------------------------------------------|----------------------------------------------------------------------------------------------------------------------------------------------------------------------------------------------------------------------------------------------------------------------------------------------------------------------------------------------------------------------------|
| Medical School Hamburg                 | Medicine in a digital world                                                   | 28 lessons elective course                                                                                                     | Review of an app or AI application (text and presentation) | <ul style="list-style-type: none"> <li>- telemedicine</li> <li>- digital health applications</li> <li>- "Clinical Decision Support" based on Artificial Intelligence and Data Literacy</li> </ul>                                                                                                                                                                          |
| Hannover Medical School                | Digitization of Medicine - Acquisition of Basic Competencies in Data Literacy | approx. 11 face to face lessons and approx. 27 online lessons                                                                  | Oral examination                                           | <p>Data Literacy:</p> <ul style="list-style-type: none"> <li>- Conceptual Framework</li> <li>- Data Collection</li> <li>- Data Management</li> <li>- Data Evaluation</li> <li>- Data Application</li> </ul>                                                                                                                                                                |
| Ruprecht Karl University of Heidelberg | Digital medicine                                                              | four dates with a total of approx. 31 lessons                                                                                  | not determinable                                           | <ul style="list-style-type: none"> <li>- What will medicine of the future look like?</li> <li>- Apps and chatbots</li> <li>- Data privacy</li> <li>- Doctor-patient relationship</li> <li>- Machine learning, blockchain</li> </ul>                                                                                                                                        |
| Johannes Gutenberg University Mainz    | Medicine in the digital age                                                   | Elective course for one week with approx. four face to face lessons each as well as e-learning unit since summer semester 2017 | existing                                                   | <ol style="list-style-type: none"> <li>1.) Digital doctor-patient communication and social networks</li> <li>2.) "Smart devices" and medical apps</li> <li>3.) Tele emergency physician, teleradiology, telemedicine</li> <li>4.) "Virtual reality," "augmented reality" and computer-assisted surgery</li> <li>5.) Individualized medicine and BigData</li> </ol>         |
| Philipps University of Marburg         | Image analysis and AI methods for medical professionals                       | not determinable                                                                                                               | Project and oral exam                                      | <ul style="list-style-type: none"> <li>- Development of concepts and IT potentials</li> <li>- Human vs. machine "seeing",</li> <li>- AI, deep learning, artificial creativity, AI in research,</li> <li>- discussion of scenarios</li> </ul>                                                                                                                               |
| Ulm University                         | Fit for digitization in the healthcare system                                 | elective preclinical                                                                                                           | Term paper                                                 | <ul style="list-style-type: none"> <li>- Explain and evaluate principles relating to medical confidentiality, data protection in the health care sector and copyright</li> <li>- transfer principles to new problem cases in professional practice and assess the associated opportunities and risks</li> <li>- practice responsible handling of data and media</li> </ul> |

|                    |                                           |                                           |                                          |                             |                                                                                                                                                                                                                                                                                                                     |
|--------------------|-------------------------------------------|-------------------------------------------|------------------------------------------|-----------------------------|---------------------------------------------------------------------------------------------------------------------------------------------------------------------------------------------------------------------------------------------------------------------------------------------------------------------|
| compulsory courses | Witten/Herdecke University                | Digital Literacy                          | five ECTS                                | Project                     | EU Digital Literacy Framework with the following content:<br>1) Information and Data Literacy<br>2) Communication and Collaboration<br>3) Digital Content Creation<br>4) Privacy<br>5) Problem Solving                                                                                                              |
|                    | Witten/Herdecke University                | Digital Medicine                          | two-four ECTS                            | Presentation/essay          | Current topics in the digital transformation of healthcare                                                                                                                                                                                                                                                          |
|                    | Witten/Herdecke University                | Digital transformation - master plan      | two ECTS                                 | Online Multiple Choice Exam | Digital transformation of society, the economy and the healthcare system                                                                                                                                                                                                                                            |
|                    |                                           |                                           |                                          |                             |                                                                                                                                                                                                                                                                                                                     |
|                    | Martin Luther University Halle-Wittenberg | Digitisation Curriculum                   | six lessons, 5th semester Human Medicine | none / only reflection      | Introduction to the topic of digitalisation in medicine<br>Hands-on and reflection on the topics:<br>- Medical apps, robotics, VR/AR applications, 3D printing<br>- Reflection of possible applications in medicine, limits, risks and opportunities<br>- Counseling skills for patients on the use of medical apps |
|                    | Hannover Medical School                   | Medical Informatics (Lecture and Seminar) | 20 lessons lecture, six lessons seminar  | Multiple Choice Exam        | - Basics of medical informatics such as image processing and med. information systems<br>- Digitization in prevention, diagnostics and therapy, in research, science and teaching as well as in the organization of the health care system<br>- Data preparation and analysis (Excel), Big Data & Data Mining       |

|                                        |                           |                                                                                                                                                                                                                                    |                                     |                                                                                                                                                                                                                                                                                                                                                                                                                                                |
|----------------------------------------|---------------------------|------------------------------------------------------------------------------------------------------------------------------------------------------------------------------------------------------------------------------------|-------------------------------------|------------------------------------------------------------------------------------------------------------------------------------------------------------------------------------------------------------------------------------------------------------------------------------------------------------------------------------------------------------------------------------------------------------------------------------------------|
| Hannover Medical School                | Seminar<br>Teleneurologie | three lessons integrated as part of neurology                                                                                                                                                                                      | integrated questions in module exam | <ul style="list-style-type: none"> <li>- Communication technology &amp; data transfer</li> <li>- requirements for telemedicine systems</li> <li>- ethical and legal responsibility</li> <li>- Diagnosis, use of additional tools (e.g. apps, smart devices...)</li> </ul>                                                                                                                                                                      |
| Ruprecht Karl University of Heidelberg | Seminar<br>Teleneurology  | Part of the cross-sectional area: "Epidemiology, medical biometry and medical informatics". approx. seven lessons and approx. three lessons practical training                                                                     | Part of a written exam              | <p>Importance of systematic data collection and data management for both the quality of medical care and the economic design of care processes.</p> <p>Lecture:</p> <ul style="list-style-type: none"> <li>- Theory of data, images and biosignals.</li> </ul> <p>Practical Training:</p> <ul style="list-style-type: none"> <li>- Coding, classification and research</li> </ul>                                                              |
| University of Münster                  | Medical Informatics       | 1 <sup>st</sup> semester: Introductory course<br>5 <sup>th</sup> semester: Lecture and practical training                                                                                                                          | Part of a written exam              | <p>Lecture, I.A:</p> <ul style="list-style-type: none"> <li>- Information management</li> <li>- telematics</li> <li>- Biomedical Informatics</li> </ul> <p>Practical Training:</p> <ul style="list-style-type: none"> <li>- clinical workplace system such as PACS, ICD,/OPS</li> <li>- electronic charting, coding</li> <li>- Pubmed research strategies</li> </ul>                                                                           |
| University of Lübeck                   | Medical Informatics       | Part of the cross-sectional area: "Epidemiology, medical biometry and medical informatics".<br>Lecture (two semester hours per week, 30 lessons) and practical exercises in small groups (two semester hours per week, 30 lessons) | Multiple Choice Exam                | <ul style="list-style-type: none"> <li>- Overview of the field of medical informatics and basic principles of informatics</li> <li>- Medical documentation and clinical information systems</li> <li>- Hospital management</li> <li>- Coding of diagnoses and procedures (ICD-10, OPS)</li> <li>- DRG case classification system</li> <li>- Medical image processing</li> <li>- Telemedicine, health telematics and data protection</li> </ul> |

|  |                                |                                                                            |                                                                                                                                                                                                                                                                                                                        |                                                                                                                                                                                                                                                                                          |                                                                                                                                                                                                                                                                                               |
|--|--------------------------------|----------------------------------------------------------------------------|------------------------------------------------------------------------------------------------------------------------------------------------------------------------------------------------------------------------------------------------------------------------------------------------------------------------|------------------------------------------------------------------------------------------------------------------------------------------------------------------------------------------------------------------------------------------------------------------------------------------|-----------------------------------------------------------------------------------------------------------------------------------------------------------------------------------------------------------------------------------------------------------------------------------------------|
|  | Philipps University of Marburg | cross-sectional area                                                       | Medical informatics part of the compulsory course cross-sectional area one                                                                                                                                                                                                                                             | Multiple Choice Exam                                                                                                                                                                                                                                                                     | <ul style="list-style-type: none"> <li>- Basic knowledge from the field of med. informatics</li> <li>- Data protection</li> <li>- Digital applications in relation to diagnosis and surgery coding (Diacos) to increase drug therapy safety and evidence-based medicine (UpToDate)</li> </ul> |
|  | Witten/ Herdecke University    | Quo vadis medical studies? Digital care as a central component of training | <p>Integrated:</p> <p>Personality development in the 1<sup>st</sup>-10<sup>th</sup> semesters via the study fundamental basics</p> <p>Medical informatics in the 2<sup>nd</sup>-4<sup>th</sup> semesters (methodology).</p> <p>Scientific work in the 6<sup>th</sup> &amp; 10<sup>th</sup> semesters (open topics)</p> | <p>Digital Medicine - How will data change the way we treat?</p> <ul style="list-style-type: none"> <li>- Digital Literacy</li> <li>- Economic, ethical and political implications of the digitalisation of health care</li> <li>- Minimizing risks, exploiting opportunities</li> </ul> |                                                                                                                                                                                                                                                                                               |
